# Supplementary material for: Thyroid Hormone Protects from Fasting-Induced Skeletal Muscle Atrophy by Promoting Metabolic Adaptation
Source: PubMed Central journal article supplement (PMC6888244; doi:10.3390/ijms20225754), 2019-11-15
Supplement: ijms-20-05754-s001.pdf [file ijms-20-05754-s001.pdf]

## Supplementary Figures

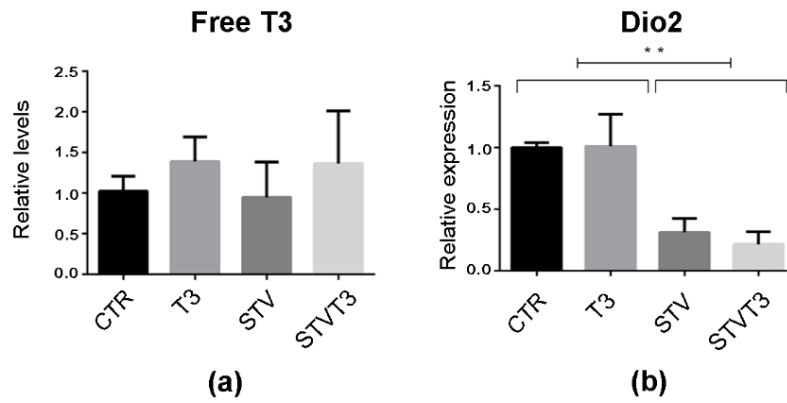

**Figure S1:** Thyroid hormone treatment does not affect circulating T3 levels or Dio2 expression in skeletal muscle. **(a)** Quantification of free T3 serum levels by ELISA assay, 48 hours after treatments.  $n=4$  mice per each condition. Data are presented as means  $\pm$  SD. **(b)** Dio2 mRNA expression by real time PCR, 24 hours after treatments.  $n=4$  mice per each condition. Data are presented as means  $\pm$  SD; STV has a significant effect: \*\*  $p < 0.0001$  by two-way ANOVA.

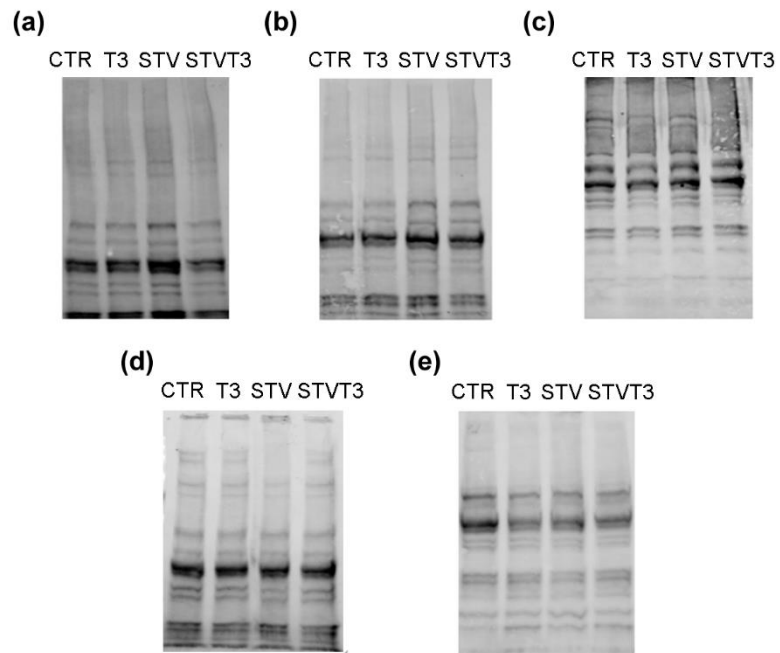

**Figure S2:** Stain-free blot membranes. (a) pFOXO3a and pAKT membrane; (b) FOXO3a and AKT membrane; (c) LC3 and p62 membrane; (d) Puromycin membrane; (e) TOM20 and PGC-1 $\alpha$  membrane.

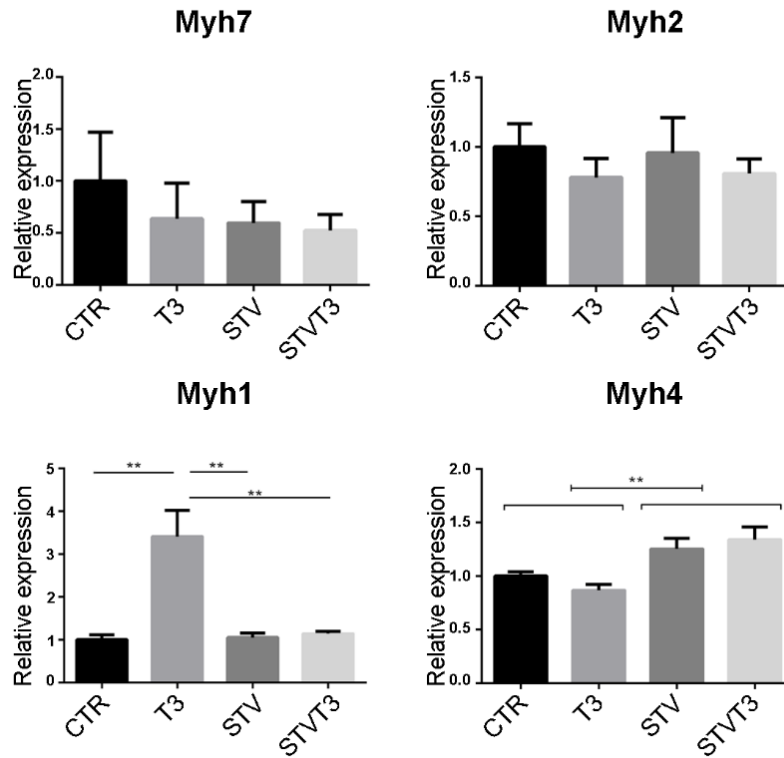

**Figure S3:** Metabolic shift does not correlate with changes in myosin heavy chain expression. Expression levels of indicated myosin heavy chain genes in TA, 24 hours after treatments. n=6 mice per each condition. Data are presented as means  $\pm$  SD. For Myh1: T3 has a significant effect ( $p < 0.0001$ ); STV has a significant effect ( $p = 0.0001$ ); and the two variables significantly interact ( $p = 0.0001$ ) by two-way ANOVA; \*\*  $p < 0.01$  by post-hoc Tukey's HSD test. For Myh4: STV has a significant effect ( $p = 0.0007$ ) by two-way ANOVA.
